# Supplementary material for: RedOx-controlled sorption of iodine anions by hydrotalcite composites
Source: Royal Society of Chemistry journal article supplement (doi:10.1039/c6ra13092e), 2016-01-01
Supplement: c6ra13092e1.pdf [file c6ra13092e1.pdf]

**Electronic Supplementary Information for:**

**Iodine-Selective RedOx-Active Hydrotalcite Composites**

Tatiana G. Levitskaia,<sup>a,\*</sup> Sayandev Chatterjee,<sup>a</sup> Bruce W. Arey,<sup>a</sup> Emily L. Campbell,<sup>a</sup> Yongchun Hong,<sup>b</sup> Libor Kovarik,<sup>b</sup> James M. Peterson,<sup>a</sup> Natasha K. Pence,<sup>a</sup> Jesus Romero,<sup>a</sup> Vaithialingam Shutthanandan,<sup>b</sup> Birgit Schwenzer<sup>c</sup> and Tamas Varga<sup>b</sup>

<sup>a</sup> Energy and Environment Directorate, Pacific Northwest National Laboratory, Richland, WA 99354, United States.

<sup>b</sup> Environmental and Molecular Sciences Laboratory, Pacific Northwest National Laboratory, Richland, WA 99354, United States.

<sup>c</sup> Physical and Computational Sciences Directorate, Pacific Northwest National Laboratory, Richland, WA 99354, United States.

**Table of Contents**

| Title                                                                                                                                                                                                                                                                                                                                                            | Page No. |
|------------------------------------------------------------------------------------------------------------------------------------------------------------------------------------------------------------------------------------------------------------------------------------------------------------------------------------------------------------------|----------|
| <b>Table S1.</b> Concentrations of the selected specified constituents in the groundwater collected from U.S. Department of Energy Hanford Site (200 area, well 299-W19-36).                                                                                                                                                                                     | S3       |
| <b>Table S2.</b> Assignment of XPS peaks.                                                                                                                                                                                                                                                                                                                        | S4       |
| <b>Table S3.</b> Elemental analysis of the marked regions in Figure S2 for the untreated <b>Co-Cr</b> and <b>Ni-Cr</b> composites obtained from EDS analyses showing the respective atomic percentages of the elements.                                                                                                                                          | S5       |
| <b>Table S4.</b> Elemental analysis of the marked regions in Figure S4 for the $\text{IO}_4^-$ treated <b>Co-Cr</b> composite obtained from EDS analyses showing the respective atomic percentages of the elements.                                                                                                                                              | S5       |
| <b>Table S5.</b> Elemental analysis of the marked regions in Figure S6 for the $\text{IO}_3^-$ treated <b>Co-Cr</b> composite obtained from EDS analyses showing the respective atomic percentages of the elements.                                                                                                                                              | S6       |
| <b>Table S6.</b> Elemental analysis of the marked regions in Figure S8 for the $\text{I}^-$ treated <b>Co-Cr</b> composite obtained from EDS analyses showing the respective atomic percentages of the elements.                                                                                                                                                 | S6       |
| <b>Table S7.</b> Elemental analysis of the marked regions in Figure S10 for the $\text{IO}_4^-$ treated <b>Ni-Cr</b> composite obtained from EDS analyses showing the respective atomic percentages of the elements.                                                                                                                                             | S7       |
| <b>Table S8.</b> Elemental analysis of the marked regions in Figure S11 for the $\text{IO}_3^-$ treated <b>Ni-Cr</b> composite obtained from EDS analyses showing the respective atomic percentages of the elements.                                                                                                                                             | S7       |
| <b>Table S9.</b> Elemental analysis of the marked regions in Figure S12 for the $\text{I}^-$ treated <b>Ni-Cr</b> composite obtained from EDS analyses showing the respective atomic percentages of the elements.                                                                                                                                                | S7       |
| <b>Figure S1.</b> XPS patterns of (—) unexposed composites, and exposed to (—) $10^{-1}$ M $\text{I}^-$ , (—) $\text{IO}_3^-$ and (—) $\text{IO}_4^-$ for 24 hours: O 1s region for (A) <b>Co-Cr</b> , (B) <b>Ni-Cr</b> .                                                                                                                                        | S8       |
| <b>Figure S2.</b> Representative elemental distribution in the untreated composites: (A) Representative SEM of <b>Co-Cr</b> composite, (B) Cr mapping of the represented region (C) Co mapping for the represented region, (D) Representative SEM of <b>Ni-Cr</b> composite, (E) Cr mapping of the represented region (F) Co mapping for the represented region. | S8       |

|                                                                                                                                                                                                                                                                                                                                                                                                                                                                                                         |     |
|---------------------------------------------------------------------------------------------------------------------------------------------------------------------------------------------------------------------------------------------------------------------------------------------------------------------------------------------------------------------------------------------------------------------------------------------------------------------------------------------------------|-----|
| <b>Figure S3.</b> Representative SEM images of the composites: after 7 day exposure to aqueous solutions of anions: (A) <b>Co-Cr</b> exposed to $10^{-1}$ M $\text{IO}_4^-$ , (B) <b>Co-Cr</b> exposed to $10^{-1}$ M $\text{IO}_3^-$ , (C) <b>Co-Cr</b> exposed to $10^{-1}$ M $\text{I}^-$ , (D) <b>Ni-Cr</b> exposed to $10^{-1}$ M $\text{IO}_4^-$ , (E) <b>Ni-Cr</b> exposed to $10^{-1}$ M $\text{IO}_3^-$ , (F) <b>Ni-Cr</b> exposed to $10^{-1}$ M $\text{I}^-$ .                               | S9  |
| <b>Figure S4.</b> Representative elemental distribution in the $\text{IO}_4^-$ treated <b>Co-Cr</b> composite: (A) Representative SEM image of the <b>Co-Cr</b> composite after being exposed to $10^{-1}$ M $\text{IO}_4^-$ for 24 hours, (B, C, D) Co, Cr and I mapping for region represented by pane A, (E) Representative SEM image of the <b>Co-Cr</b> composite after being exposed to $10^{-1}$ M $\text{IO}_4^-$ for 7 days, (F, G, H) Co, Cr and I mapping for region represented by pane E.  | S9  |
| <b>Figure S5.</b> (A, B) Representative TEM image of <b>Co-Cr</b> composite after exposure to $10^{-1}$ M $\text{IO}_4^-$ for 24 hours (C, D) the EDS analysis of regions marked 1 and 2 respectively in pane B.                                                                                                                                                                                                                                                                                        | S10 |
| <b>Figure S6.</b> Representative elemental distribution in the $\text{IO}_3^-$ treated <b>Co-Cr</b> composite: (A) Representative SEM image of the <b>Co-Cr</b> composite after being exposed to $10^{-1}$ M $\text{IO}_4^-$ for 24 hours, (B, C, D) Co, Cr and I mapping for region represented by pane A, (E) Representative SEM image of the <b>Co-Cr</b> composite after being exposed to $10^{-1}$ M $\text{IO}_3^-$ for 7 days, (F, G, H)                                                         | S10 |
| <b>Figure S7.</b> (A, B) Representative TEM image of <b>Co-Cr</b> composite after exposure to $10^{-1}$ M $\text{IO}_3^-$ for 24 hours (C, D) the EDS analysis of regions marked 1 and 2 respectively in pane B.                                                                                                                                                                                                                                                                                        | S11 |
| <b>Figure S8.</b> Representative elemental distribution in the $\text{I}^-$ treated <b>Co-Cr</b> composite: (A) Representative SEM image of the <b>Co-Cr</b> composite after being exposed to $10^{-1}$ M $\text{I}^-$ for 24 hours, (B, C, D) Co, Cr and I mapping for region represented by pane A, (E) Representative SEM image of the <b>Co-Cr</b> composite after being exposed to $10^{-1}$ M $\text{I}^-$ for 7 days, (F, G, H) Co, Cr and I mapping for region represented by pane E.           | S11 |
| <b>Figure S9.</b> <b>Co-Cr</b> composite exposed to $10^{-1}$ M $\text{I}^-$ for 24 hours: representative TEM images of the spinels (A) embedded in the heterogeneous matrix and (B) the magnified spinels, (C) representative TEM of the heterogeneous matrix, (D) EDS of particle in region 1 of pane B, (I) EDS of matrix region 2 of pane C.                                                                                                                                                        | S12 |
| <b>Figure S10.</b> Representative elemental distribution in the $\text{IO}_4^-$ treated <b>Ni-Cr</b> composite: (A) Representative SEM image of the <b>Ni-Cr</b> composite after being exposed to $10^{-1}$ M $\text{IO}_4^-$ for 24 hours, (B, C, D) Ni, Cr and I mapping for region represented by pane A, (E) Representative SEM image of the <b>Ni-Cr</b> composite after being exposed to $10^{-1}$ M $\text{IO}_4^-$ for 7 days, (F, G, H) Ni, Cr and I mapping for region represented by pane E. | S12 |
| <b>Figure S11.</b> Representative elemental distribution in the $\text{IO}_3^-$ treated <b>Ni-Cr</b> composite: (A) Representative SEM image of the <b>Ni-Cr</b> composite after being exposed to $10^{-1}$ M $\text{IO}_3^-$ for 24 hours, (B, C, D) Ni, Cr and I mapping for region represented by pane A, (E) Representative SEM image of the <b>Ni-Cr</b> composite after being exposed to $10^{-1}$ M $\text{IO}_3^-$ for 7 days, (F, G, H) Ni, Cr and I mapping for region represented by pane E. | S13 |
| <b>Figure S12.</b> Representative elemental distribution in the $\text{I}^-$ treated <b>Ni-Cr</b> composite: (A) Representative SEM image of the <b>Ni-Cr</b> composite after being exposed to $10^{-1}$ M $\text{I}^-$ for 24 hours, (B, C, D) Ni, Cr and I mapping for region represented by pane A, (E) Representative SEM image of the <b>Ni-Cr</b> composite after being exposed to $10^{-1}$ M $\text{I}^-$ for 7 days, (F, G, H) Ni, Cr and I mapping for region represented by pane E.          | S13 |
| <b>References</b>                                                                                                                                                                                                                                                                                                                                                                                                                                                                                       | S14 |

**Table S1.** Concentrations of the selected specified constituents in the groundwater collected from U.S. Department of Energy Hanford Site (200 area, well 299-W19-36). The complete groundwater composition is reported in reference 1.

| <b>Constituent</b>              | <b>Concentration (µg/L)</b> | <b>Molarity (M)</b>    |
|---------------------------------|-----------------------------|------------------------|
| Barium                          | 113                         | $8.23 \times 10^{-7}$  |
| Calcium                         | 122,000                     | $3.04 \times 10^{-3}$  |
| Chloride                        | 181,000                     | $5.11 \times 10^{-3}$  |
| Total Cr                        | 17.3                        | $3.33 \times 10^{-7}$  |
| Cr(VI)                          | 0.05                        | $9.62 \times 10^{-10}$ |
| Magnesium                       | 36,400                      | $1.50 \times 10^{-3}$  |
| Molybdenum                      | 65.9                        | $6.87 \times 10^{-7}$  |
| Nitrate                         | 317,000                     | $5.11 \times 10^{-3}$  |
| Potassium                       | 7,010                       | $1.79 \times 10^{-4}$  |
| Sodium                          | 118,000                     | $5.13 \times 10^{-3}$  |
| Sulfate                         | 50,000                      | $5.21 \times 10^{-4}$  |
| Strontium                       | 618                         | $7.05 \times 10^{-6}$  |
| Tin                             | 216                         | $1.82 \times 10^{-6}$  |
| Alkalinity (CaCO <sub>3</sub> ) | 116,000                     | $1.16 \times 10^{-3}$  |
| Uranium                         | 174                         | $7.31 \times 10^{-7}$  |
| Iodine <sup>a)</sup>            | 8.6 ± 0.9                   | $6.8 \times 10^{-8}$   |

<sup>a)</sup> Iodine concentration was measured in this work by ICP-MS analysis.

**Table S2.** Assignment of XPS peaks.

| Assignment                                           | Position (ev)                    |
|------------------------------------------------------|----------------------------------|
| Cr 2p <sub>3/2</sub> for Cr <sup>3+</sup>            | 577.2 <sup>1</sup>               |
| Cr 2p <sub>3/2</sub> for Cr <sup>6+</sup>            | 579.2 <sup>2</sup>               |
| Cr 2p <sub>1/2</sub> for Cr <sup>3+</sup>            | 586.8 <sup>3</sup>               |
| Cr 2p <sub>1/2</sub> for Cr <sup>6+</sup>            | 588.7 <sup>3</sup>               |
| Co 2p <sub>3/2</sub> for Co <sup>2+</sup>            | 780.9 <sup>4</sup>               |
| Co 2p <sub>3/2</sub> for Co <sup>3+</sup>            | 779.8 <sup>5</sup>               |
| Co 2p <sub>3/2</sub> for Co <sup>2+</sup> satellite  | 782.6, 786.4 <sup>6</sup>        |
| Co 2p <sub>3/2</sub> for Co <sup>3+</sup> satellite  | 781.1 <sup>6</sup>               |
| Cl 2p <sub>3/2</sub> for Cl <sup>-</sup>             | 198.7 <sup>7</sup>               |
| Ni 2p <sub>3/2</sub> for Ni <sup>2+</sup>            | 855.7 <sup>6</sup>               |
| Ni 2p <sub>3/2</sub> for Ni <sup>2+</sup> satellites | 857.7, 861.5, 866.5 <sup>6</sup> |
| O 1s for Cr(OH) <sub>3</sub>                         | 531.7 <sup>8</sup>               |
| O 1s for Cr <sub>2</sub> O <sub>3</sub>              | 530.7 <sup>9</sup>               |
| O 1s for CrO <sub>3</sub>                            | 530.6 <sup>10</sup>              |
| O 1s for Co <sub>3</sub> O <sub>4</sub>              | 531.4 <sup>11</sup>              |
| O 1s for Ni(OH) <sub>2</sub>                         | 532.0 <sup>12</sup>              |
| I 3d <sub>5/2</sub> for I <sup>-</sup>               | 618.8 <sup>13</sup>              |
| I 3d <sub>5/2</sub> for I <sub>2</sub>               | 620.5 <sup>14</sup>              |
| I 3d <sub>5/2</sub> for IO <sub>3</sub> <sup>-</sup> | 623.9 <sup>15</sup>              |
| I 3d <sub>5/2</sub> for IO <sub>4</sub> <sup>-</sup> | 624.2 <sup>15</sup>              |

**Table S3.** Elemental analysis of the marked regions in Figure S2 for the untreated **Co-Cr** and **Ni-Cr** composites obtained from EDS analyses showing the respective atomic percentages of the elements.

| <b>Co-Cr</b>  |          |          |           |           |           |
|---------------|----------|----------|-----------|-----------|-----------|
| <b>Region</b> | <b>C</b> | <b>O</b> | <b>Cl</b> | <b>Cr</b> | <b>Co</b> |
| <b>1</b>      | 22.93    | 50.66    | 4.76      | 6.37      | 15.28     |
| <b>2</b>      | 21.99    | 50.46    | 4.92      | 6.22      | 15.42     |
| <b>3</b>      | 24       | 49.06    | 2.96      | 3.33      | 20.64     |
| <b>4</b>      | 24.85    | 50.44    | 2.95      | 3.11      | 19.89     |
| <b>5</b>      | 21.72    | 49.91    | 3.21      | 3.22      | 21.94     |
| <b>Ni-Cr</b>  |          |          |           |           |           |
| <b>Region</b> | <b>C</b> | <b>O</b> | <b>Cr</b> | <b>Ni</b> |           |
| <b>6</b>      | 32.21    | 45.44    | 6.40      | 15.95     |           |
| <b>7</b>      | 27.63    | 44.87    | 7.39      | 20.12     |           |
| <b>8</b>      | 24       | 49.06    | 3.30      | 20.67     |           |

**Table S4.** Elemental analysis of the marked regions in Figure S4 for the  $\text{IO}_4^-$  treated **Co-Cr** composite obtained from EDS analyses showing the respective atomic percentages of the elements.

| <b>Region</b>                                              | <b>C</b> | <b>O</b> | <b>Cl</b> | <b>Cr</b> | <b>Co</b> | <b>I</b> |
|------------------------------------------------------------|----------|----------|-----------|-----------|-----------|----------|
| <b>Exposure to <math>\text{IO}_4^-</math> for 24 hours</b> |          |          |           |           |           |          |
| <b>1</b>                                                   | 24.63    | 45.37    | 0.63      | 8.48      | 20.88     | 0        |
| <b>2</b>                                                   | 25.08    | 48.24    | 2.63      | 3.42      | 20.64     | 0        |
| <b>3</b>                                                   | 14.6     | 49.52    | 1.74      | 10.33     | 19.94     | 3.85     |
| <b>Exposure to <math>\text{IO}_4^-</math> for 7 days</b>   |          |          |           |           |           |          |
| <b>4</b>                                                   | 21.63    | 49.15    | 0.63      | 3.48      | 23.88     | 1.23     |
| <b>5</b>                                                   | 23.08    | 38.24    | 0.63      | 12.42     | 20.64     | 4.99     |
| <b>6</b>                                                   | 22.08    | 39.24    | 0.63      | 12.37     | 20.71     | 4.97     |

**Table S5.** Elemental analysis of the marked regions in Figure S6 for the  $\text{IO}_3^-$  treated **Co-Cr** composite obtained from EDS analyses showing the respective atomic percentages of the elements.

| Region                                                     | C     | O     | Cl   | Cr    | Co    | I    |
|------------------------------------------------------------|-------|-------|------|-------|-------|------|
| <b>Exposure to <math>\text{IO}_3^-</math> for 24 hours</b> |       |       |      |       |       |      |
| <b>1</b>                                                   | 25.5  | 51.31 | 0.95 | 5.29  | 14.2  | 2.76 |
| <b>2</b>                                                   | 17.7  | 57.3  | 1.32 | 5.63  | 15.57 | 2.48 |
| <b>3</b>                                                   | 29.74 | 47.28 | 0.29 | 2.95  | 19.33 | 0.42 |
| <b>Exposure to <math>\text{IO}_3^-</math> for 7 days</b>   |       |       |      |       |       |      |
| <b>4</b>                                                   | 21.64 | 49.14 | 0.57 | 3.56  | 23.80 | 1.29 |
| <b>5</b>                                                   | 22.08 | 39.24 | 0.63 | 12.37 | 20.71 | 4.97 |
| <b>6</b>                                                   | 21.18 | 40.14 | 1.83 | 12.56 | 20.50 | 3.79 |

**Table S6.** Elemental analysis of the marked regions in Figure S8 for the  $\text{I}^-$  treated **Co-Cr** composite obtained from EDS analyses showing the respective atomic percentages of the elements.

| Region                                                  | C     | O     | Cl   | Cr   | Co    | I    |
|---------------------------------------------------------|-------|-------|------|------|-------|------|
| <b>Exposure to <math>\text{I}^-</math> for 24 hours</b> |       |       |      |      |       |      |
| <b>1</b>                                                | 22.26 | 56.22 | 1.44 | 5.84 | 13.64 | 0.61 |
| <b>2</b>                                                | 23.89 | 52.61 | 1.17 | 5.7  | 16.09 | 0.55 |
| <b>3</b>                                                | 22.89 | 50.58 | 0.71 | 3.01 | 22.56 | 0.26 |
| <b>4</b>                                                | 19.62 | 55.48 | 0.82 | 3.98 | 21.99 | 0.31 |
| <b>Exposure to <math>\text{I}^-</math> for 7 days</b>   |       |       |      |      |       |      |
| <b>5</b>                                                | 26.64 | 39.14 | 0.57 | 8.56 | 20.80 | 4.29 |
| <b>6</b>                                                | 26.08 | 39.24 | 0.63 | 8.37 | 20.71 | 4.97 |

**Table S7.** Elemental analysis of the marked regions in Figure S10 for the  $\text{IO}_4^-$  treated **Ni-Cr** composite obtained from EDS analyses showing the respective atomic percentages of the elements.

| Region                                                     | C     | O     | Cr   | Ni    | I    |
|------------------------------------------------------------|-------|-------|------|-------|------|
| <b>Exposure to <math>\text{IO}_4^-</math> for 24 hours</b> |       |       |      |       |      |
| <b>1</b>                                                   | 21.26 | 56.44 | 6.46 | 16.84 | 1.15 |
| <b>2</b>                                                   | 13.61 | 62.58 | 3.22 | 21.59 | 1.63 |
| <b>3</b>                                                   | 19.84 | 51.68 | 6.61 | 16.80 | 1.20 |
| <b>Exposure to <math>\text{IO}_4^-</math> for 7 days</b>   |       |       |      |       |      |
| <b>4</b>                                                   | 22.57 | 50.43 | 3.02 | 16.89 | 7.08 |
| <b>5</b>                                                   | 27.86 | 45.14 | 3.13 | 16.87 | 6.99 |

**Table S8.** Elemental analysis of the marked regions in Figure S11 for the  $\text{IO}_3^-$  treated **Ni-Cr** composite obtained from EDS analyses showing the respective atomic percentages of the elements.

| Region                                                     | C     | O     | Cr   | Ni    | I    |
|------------------------------------------------------------|-------|-------|------|-------|------|
| <b>Exposure to <math>\text{IO}_3^-</math> for 24 hours</b> |       |       |      |       |      |
| <b>1</b>                                                   | 22.35 | 54.75 | 5.75 | 15.00 | 2.15 |
| <b>2</b>                                                   | 25.15 | 52.13 | 5.53 | 14.56 | 2.63 |
| <b>3</b>                                                   | 36.05 | 40.10 | 2.94 | 20.71 | 0.20 |
| <b>Exposure to <math>\text{IO}_3^-</math> for 7 days</b>   |       |       |      |       |      |
| <b>4</b>                                                   | 28.01 | 47.36 | 2.74 | 15.91 | 5.98 |
| <b>5</b>                                                   | 30.81 | 44.56 | 3.74 | 15.46 | 5.43 |
| <b>6</b>                                                   | 27.86 | 45.14 | 3.13 | 17.87 | 5.99 |

**Table S9.** Elemental analysis of the marked regions in Figure S12 for the  $\text{I}^-$  treated **Ni-Cr** composite obtained from EDS analyses showing the respective atomic percentages of the elements.

| Region                                                  | C     | O     | Cr   | Ni    | I |
|---------------------------------------------------------|-------|-------|------|-------|---|
| <b>Exposure to <math>\text{I}^-</math> for 24 hours</b> |       |       |      |       |   |
| <b>1</b>                                                | 16.79 | 57.01 | 3.90 | 21.40 | 0 |
| <b>2</b>                                                | 17.48 | 59.74 | 5.83 | 16.35 | 0 |
| <b>3</b>                                                | 22.89 | 45.81 | 3.14 | 23.69 | 0 |
| <b>Exposure to <math>\text{I}^-</math> for 7 days</b>   |       |       |      |       |   |
| <b>4</b>                                                | 36.74 | 44.66 | 3.21 | 15.39 | 0 |
| <b>5</b>                                                | 38.81 | 42.59 | 3.74 | 14.86 | 0 |

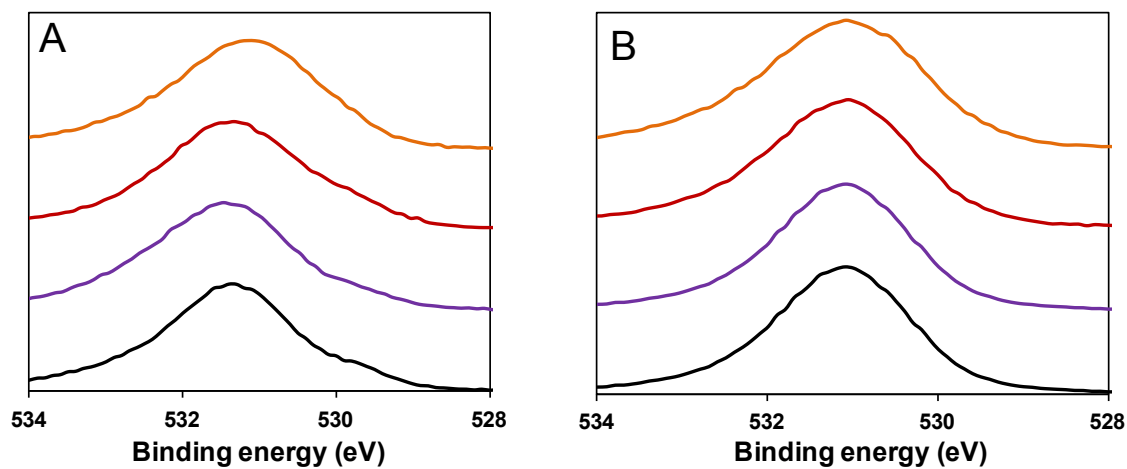

**Figure S1.** XPS patterns of (—) unexposed composites, and exposed to (—)  $10^{-1}$  M  $I^-$ , (—)  $IO_3^-$  and (—)  $IO_4^-$  for 24 hours: O 1s region for (A) Co-Cr, (B) Ni-Cr.

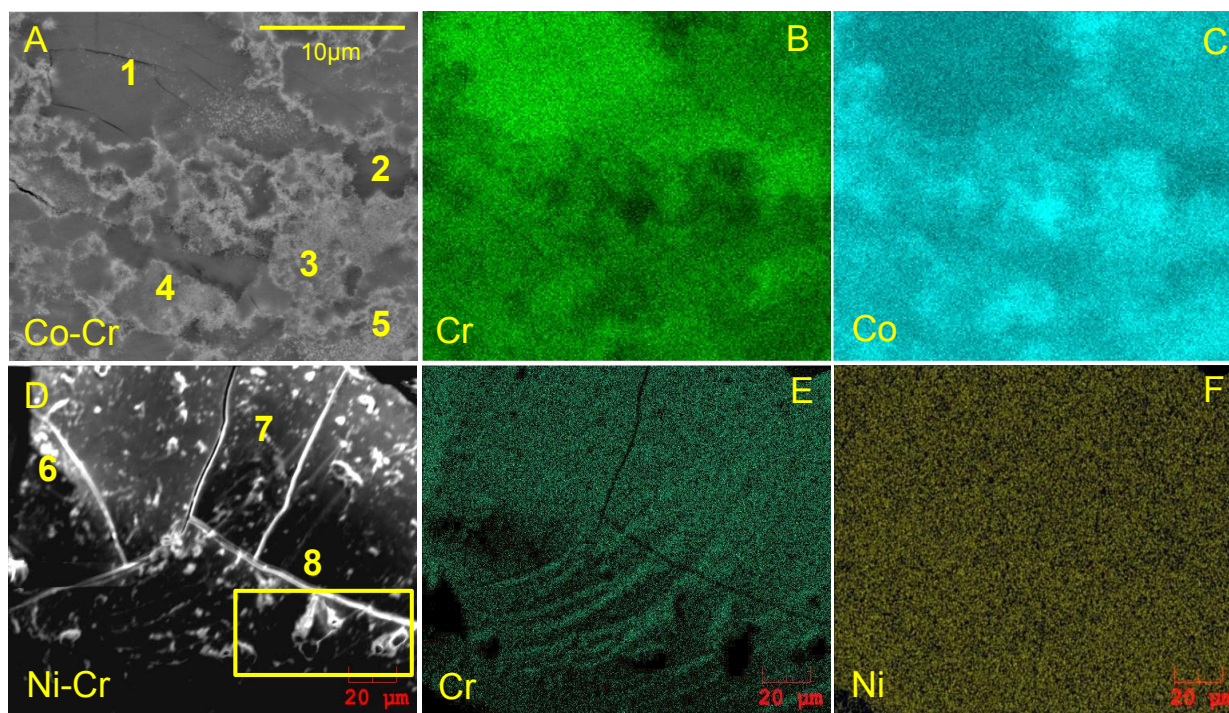

**Figure S2.** Representative elemental distribution in the untreated **M-Cr** composites: (A) Representative SEM of **Co-Cr** composite, (B) Cr mapping of the represented region (C) Co mapping for the represented region, (D) Representative SEM of **Ni-Cr** composite, (E) Cr mapping of the represented region (F) Co mapping for the represented region.



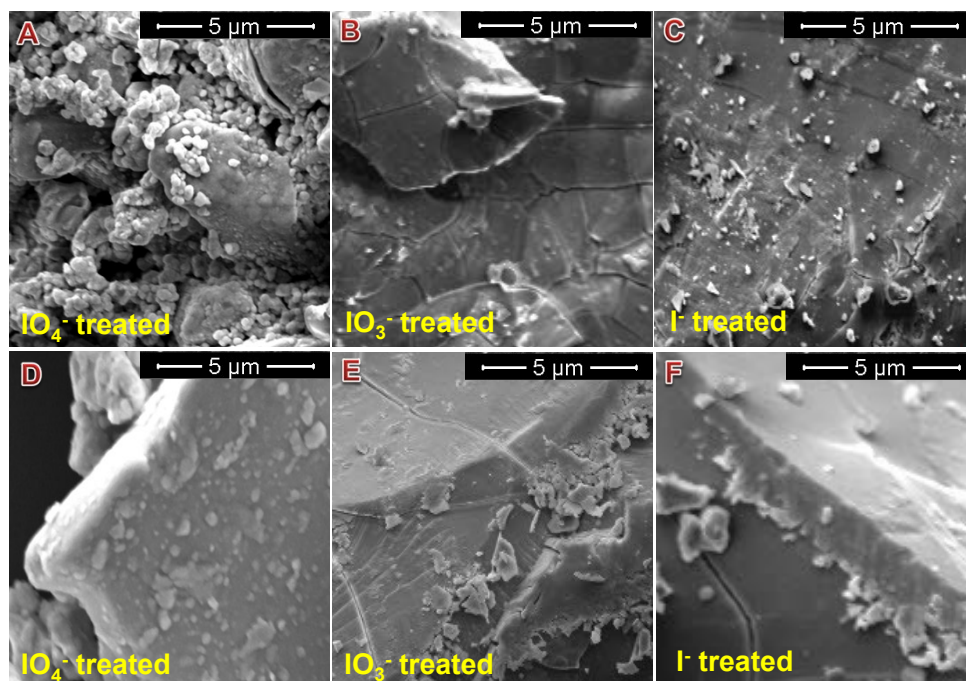

**Figure S3.** Representative SEM images of the composites: after 7 day exposure to aqueous solutions of anions: (A) **Co-Cr** exposed to  $10^{-1}$  M  $\text{IO}_4^-$ , (B) **Co-Cr** exposed to  $10^{-1}$  M  $\text{IO}_3^-$ , (C) **Co-Cr** exposed to  $10^{-1}$  M  $\text{I}^-$ , (D) **Ni-Cr** exposed to  $10^{-1}$  M  $\text{IO}_4^-$ , (E) **Ni-Cr** exposed to  $10^{-1}$  M  $\text{IO}_3^-$ , (F) **Ni-Cr** exposed to  $10^{-1}$  M  $\text{I}^-$ .

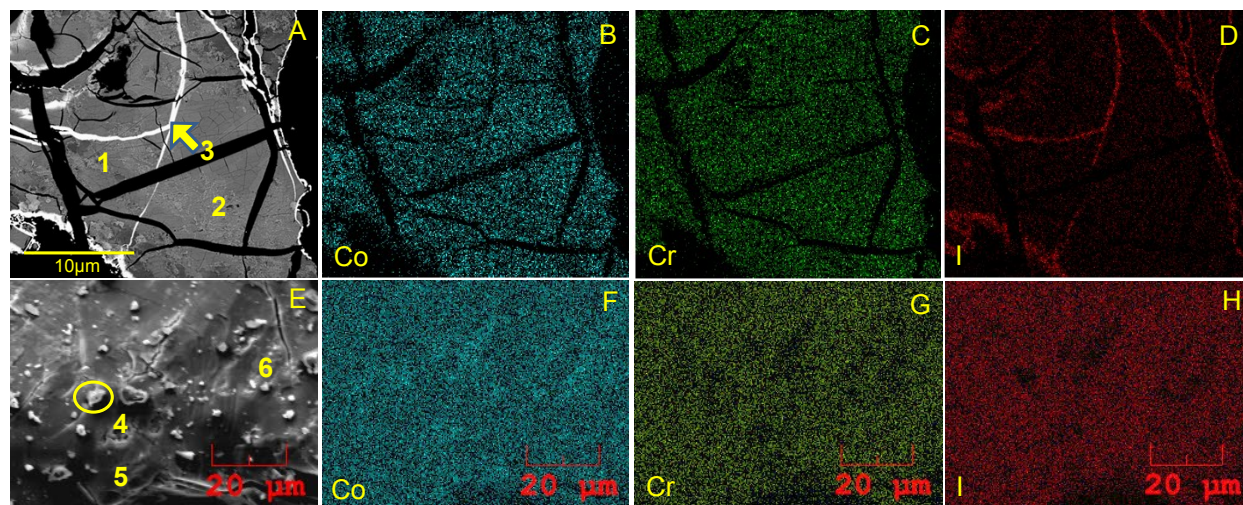

**Figure S4.** Representative elemental distribution in the  $\text{IO}_4^-$  treated **Co-Cr** composite: (A) Representative SEM image of the **Co-Cr** composite after being exposed to  $10^{-1}$  M  $\text{IO}_4^-$  for 24 hours, (B, C, D) Co, Cr and I mapping for region represented by pane A, (E) Representative SEM image of the **Co-Cr** composite after being exposed to  $10^{-1}$  M  $\text{IO}_4^-$  for 7 days, (F, G, H) Co, Cr and I mapping for region represented by pane E.

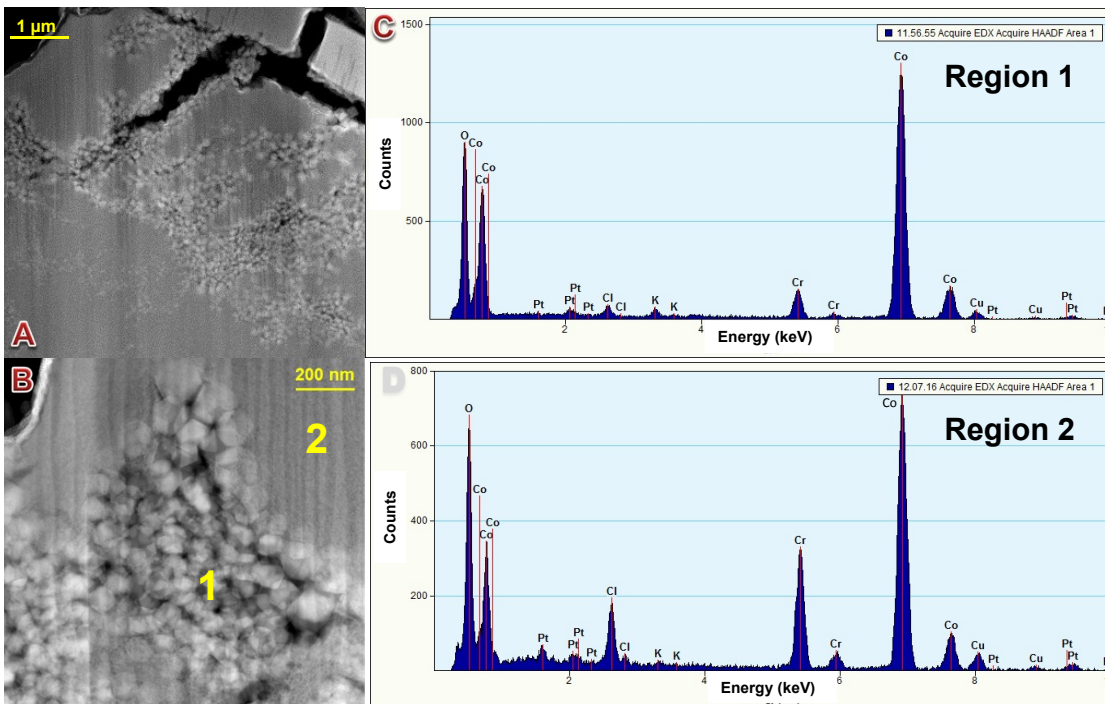

**Figure S5.** (A, B) Representative TEM image of **Co-Cr** composite after exposure to  $10^{-1}$  M  $\text{IO}_4^-$  for 24 hours (C, D) the EDS analysis of regions marked 1 and 2 respectively in pane B.

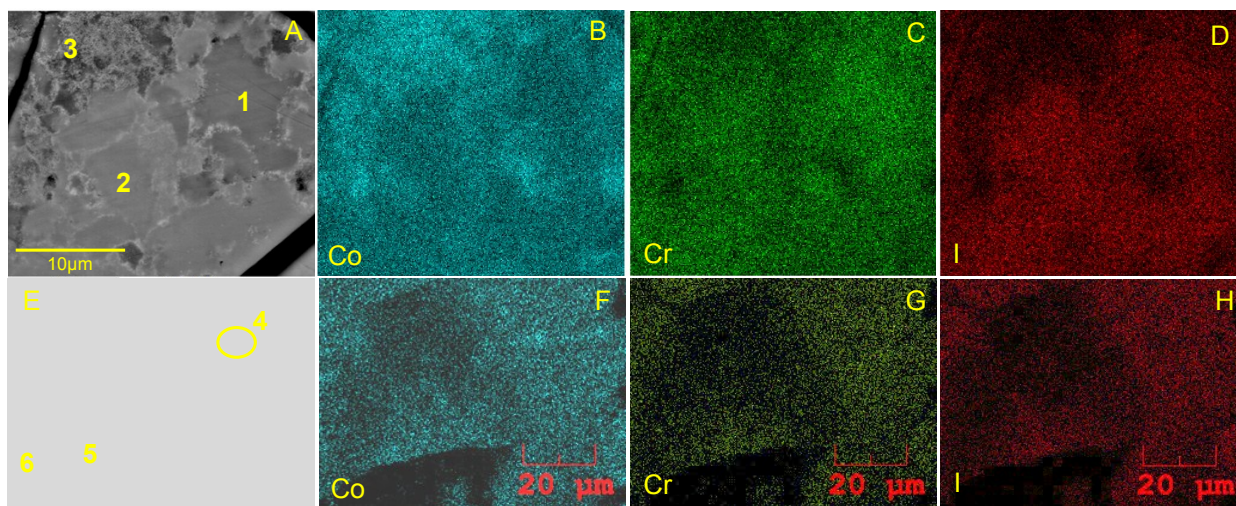

**Figure S6.** Representative elemental distribution in the  $\text{IO}_3^-$  treated **Co-Cr** composite: (A) Representative SEM image of the **Co-Cr** composite after being exposed to  $10^{-1}$  M  $\text{IO}_4^-$  for 24 hours, (B, C, D) Co, Cr and I mapping for region represented by pane A, (E) Representative SEM image of the **Co-Cr** composite after being exposed to  $10^{-1}$  M  $\text{IO}_3^-$  for 7 days, (F, G, H) Co, Cr and I mapping for region represented by pane E.



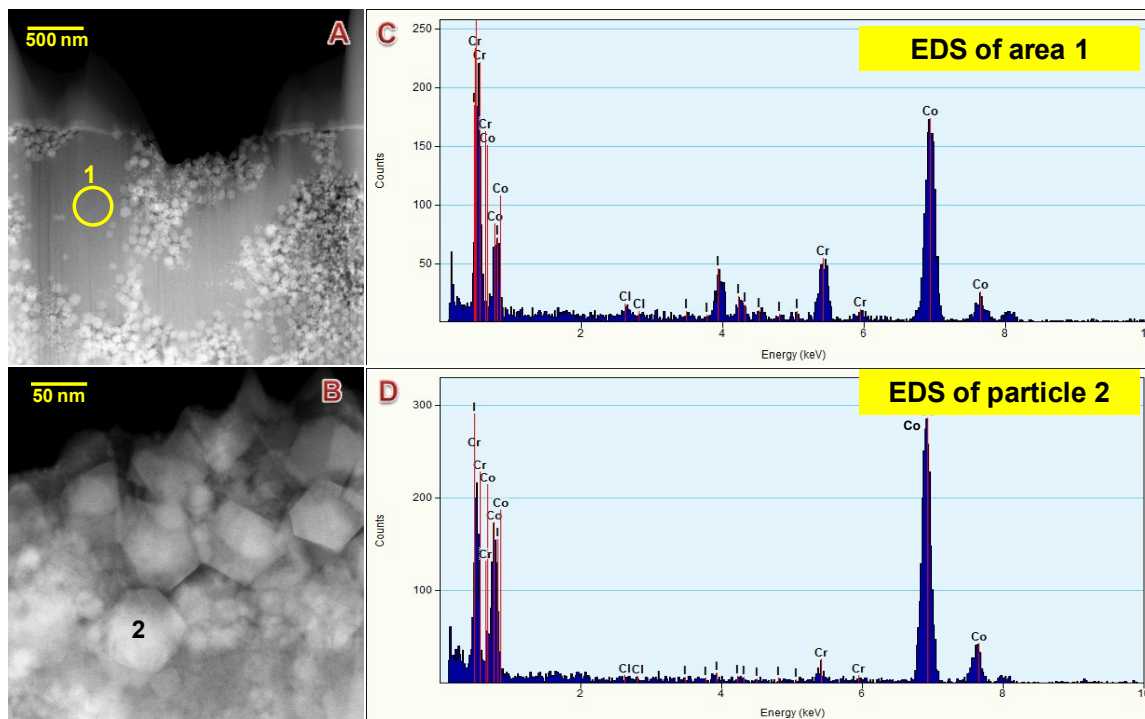

**Figure S7.** (A, B) Representative TEM image of **Co-Cr** composite after exposure to  $10^{-1}$  M  $\text{IO}_3^-$  for 24 hours (C, D) the EDS analysis of regions marked 1 and 2 respectively in figure B.

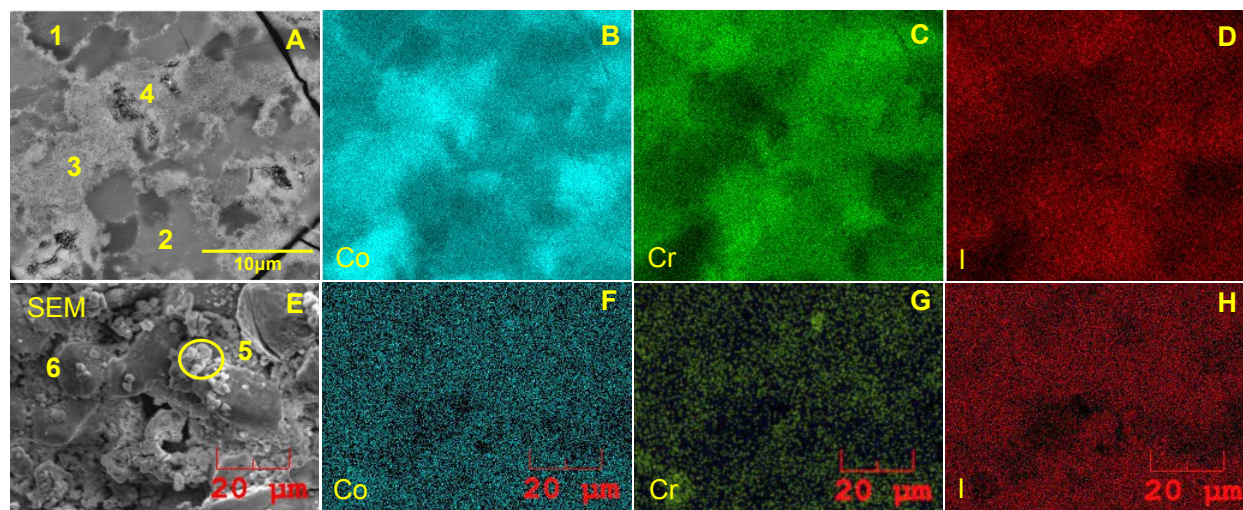

**Figure S8.** Representative elemental distribution in the  $\text{I}^-$  treated **Co-Cr** composite: (A) Representative SEM image of the **Co-Cr** composite after being exposed to  $10^{-1}$  M  $\text{I}^-$  for 24 hours, (B, C, D) Co, Cr and I mapping for region represented by pane A, (E) Representative SEM image of the **Co-Cr** composite after being exposed to  $10^{-1}$  M  $\text{I}^-$  for 7 days, (F, G, H) Co, Cr and I mapping for region represented by pane E.

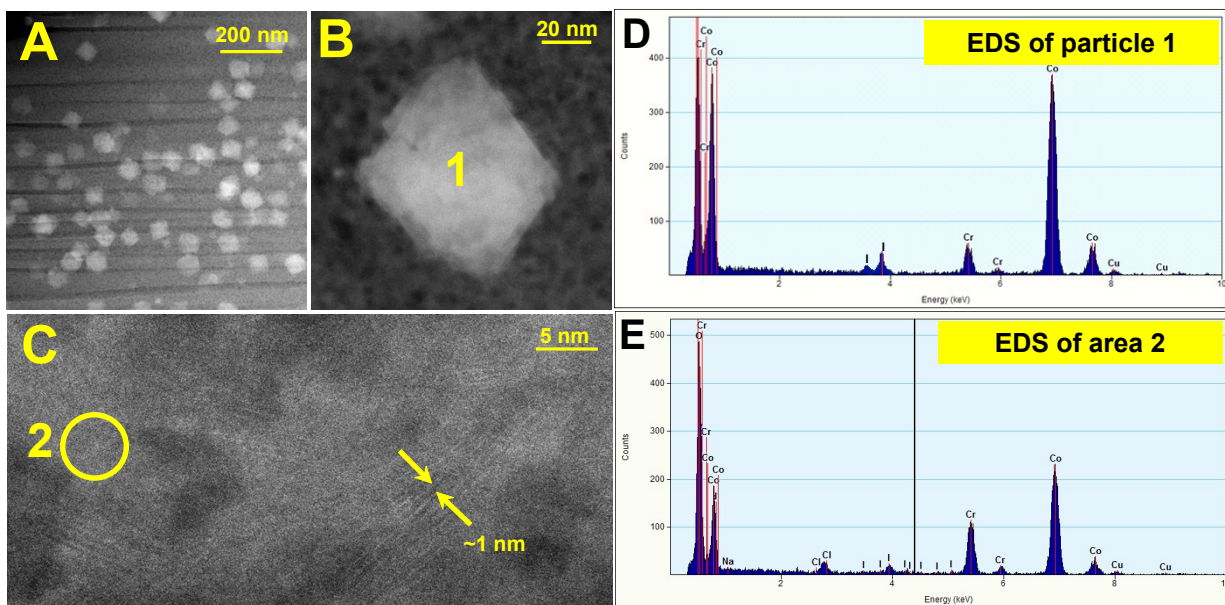

**Figure S9.** Co-Cr composite exposed to  $10^{-1}$  M I<sup>-</sup> for 24 hours: representative TEM images of the spinels (A) embedded in the heterogeneous matrix and (B) the magnified spinels, (C) representative TEM of the heterogeneous matrix, (D) EDS of particle in region 1 of pane B, (E) EDS of matrix region 2 of pane C.

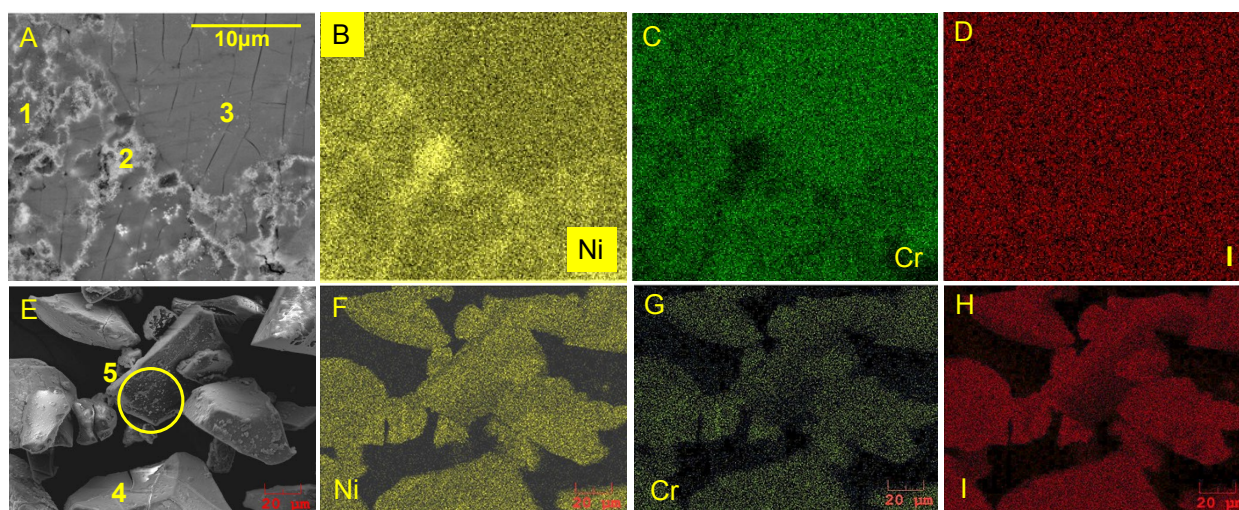

**Figure S10.** Representative elemental distribution in the  $\text{IO}_4^-$  treated Ni-Cr composite: (A) Representative SEM image of the Ni-Cr composite after being exposed to  $10^{-1}$  M  $\text{IO}_4^-$  for 24 hours, (B, C, D) Ni, Cr and I mapping for region represented by pane A, (E) Representative SEM image of the Ni-Cr composite after being exposed to  $10^{-1}$  M  $\text{IO}_4^-$  for 7 days, (F, G, H) Ni, Cr and I mapping for region represented by pane E.



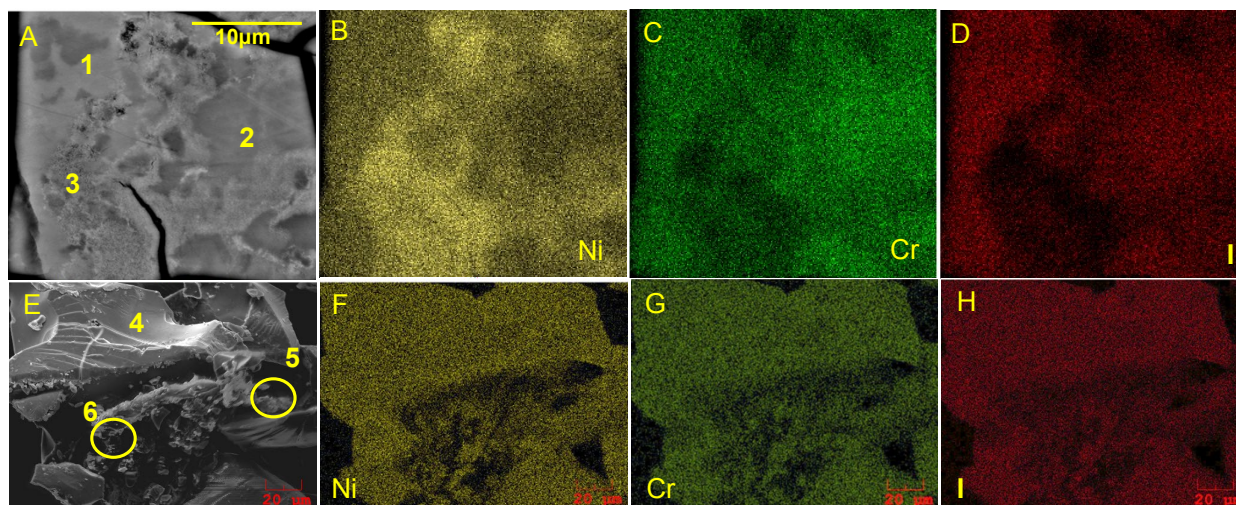

**Figure S11.** Representative elemental distribution in the  $\text{IO}_3^-$  treated **Ni-Cr** composite: (A) Representative SEM image of the **Ni-Cr** composite after being exposed to  $10^{-1}$  M  $\text{IO}_3^-$  for 24 hours, (B, C, D) Ni, Cr and I mapping for region represented by pane A, (E) Representative SEM image of the **Ni-Cr** composite after being exposed to  $10^{-1}$  M  $\text{IO}_3^-$  for 7 days, (F, G, H) Ni, Cr and I mapping for region represented by pane E.

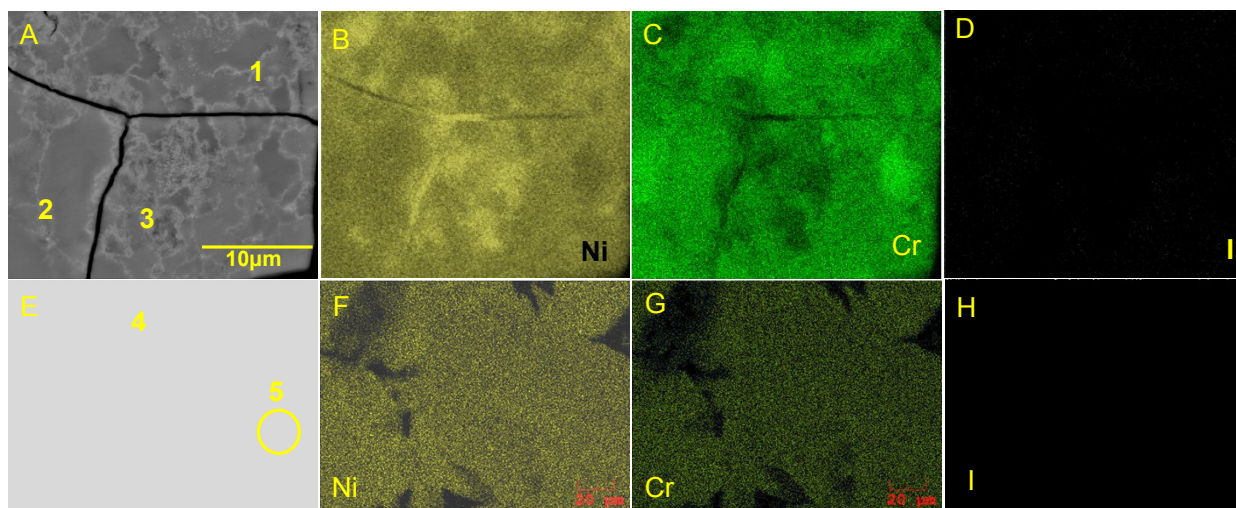

**Figure S12.** Representative elemental distribution in the  $\text{I}^-$  treated **Ni-Cr** composite: (A) Representative SEM image of the **Ni-Cr** composite after being exposed to  $10^{-1}$  M  $\text{I}^-$  for 24 hours, (B, C, D) Ni, Cr and I mapping for region represented by pane A, (E) Representative SEM image of the **Ni-Cr** composite after being exposed to  $10^{-1}$  M  $\text{I}^-$  for 7 days, (F, G, H) Ni, Cr and I mapping for region represented by pane E.

## References:

- (1) Paparazzo, E.; Severini, E.; Jimenezlopez, A.; Mairelestorres, P.; Oliverapastor, P.; Rodriguezcastellon, E.; Tomlinson, A. A. G. *J Mater Chem* **1992**, 2, 1175.
- (2) Merryfield, R.; Mcdaniel, M.; Parks, G. *J Catal* **1982**, 77, 348.
- (3) Desimoni, E.; Malitesta, C.; Zambonin, P. G.; Riviere, J. C. *Surf Interface Anal* **1988**, 13, 173.
- (4) Oku, M.; Hirokawa, K. *J Electron Spectrosc* **1976**, 8, 475.
- (5) McIntyre, N. S.; Cook, M. G. *Anal Chem* **1975**, 47, 2208.
- (6) Biesinger, M. C.; Payne, B. P.; Grosvenor, A. P.; Lau, L. W. M.; Gerson, A. R.; Smart, R. S. *Appl Surf Sci* **2011**, 257, 2717.
- (7) Beard, B. C. *Surf. Sci. Spectra* **1993**, 2, 91.
- (8) Shuttleworth, D. *J Phys Chem-Us* **1980**, 84, 1629.
- (9) Marcus, P.; Grimal, J. M. *Corros Sci* **1992**, 33, 805.
- (10) Sleigh, C.; Pijpers, A. P.; Jaspers, A.; Coussens, B.; Meier, R. J. *J Electron Spectrosc* **1996**, 77, 41.
- (11) Tyuliev, G.; Angelov, S. *Appl Surf Sci* **1988**, 32, 381.
- (12) Liang, Y. L.; Sherwood, P. M. A.; Paul, D. K. *J Chem Soc Faraday T* **1994**, 90, 1271.
- (13) Morgan, W. E.; Stec, W. J.; Vanwazer, J. R. *J Am Chem Soc* **1973**, 95, 751.
- (14) Hsu, S. L.; Signorelli, A. J.; Pez, G. P.; Baughman, R. H. *J Chem Phys* **1978**, 69, 106.
- (15) Sherwood, P. M. A. *J Chem Soc Farad T 2* **1976**, 72, 1805.
